# Supplementary material
Source: PubMed Central journal article supplement (PMC3472802)
Supplement: NIHMS404667-supplement-1_si_001.pdf [file NIHMS404667-supplement-1_si_001.pdf]

## Supporting Information

### Dynamic thiol exchange with $\beta$ -sulfido- $\alpha,\beta$ -unsaturated carbonyl compounds and dithianes

Gururaj Joshi and Eric V. Anslyn\*

*Department of Chemistry and Biochemistry,  
University of Texas at Austin, Austin, Texas 78712  
[anslyn@austin.utexas.edu](mailto:anslyn@austin.utexas.edu)*

**General Methods.** All reagents were purchased from commercial sources and used as received. An automated Varian Mercury 400MHz spectrometer was used to collect  $^1\text{H}$  NMR spectra. LCMS were recorded on Agilent 1200 HPLC interfaced to an Agilent 6130 single quadrupole mass spectrometer.

**General method for the synthesis of Vinyl sulfides.**<sup>1</sup> A mixture of 1 equiv of thiol (**2a-c**) and butynone **3** in THF/water (1:1) was stirred in presence of 15 mol % NaOAc at room temperature for 30-60 min. The reaction mixture was concentrated in *vacuo*. Water and ethyl acetate were added and the aqueous layer was extracted with ethyl acetate. The combined organic layers were washed with brine and dried over  $\text{Na}_2\text{SO}_4$ , concentrated in *vacuo* to yield **1a-c**.

$^1\text{H}$  NMR for **1a** (400 MHz,  $\text{CDCl}_3$ )  $\delta$  = 7.71 (d,  $J$  = 15.3 Hz, 1H), 7.53 – 7.30 (m, 27H), 7.26 (d,  $J$  = 11.3 Hz, 4H), 6.39 (d,  $J$  = 11.3 Hz, 4H), 6.01 (d,  $J$  = 15.3, 1H), 2.29 (s, 11H), 2.20 (s, 3H). MS for **1a**:  $[\text{M}+\text{H}]^+ = 179.2$ .

$^1\text{H}$  NMR for **1b** (400 MHz,  $\text{DMSO}-d_6$ )  $\delta$  8.05 – 7.88 (m, 10H), 7.71 – 7.54 (m, 12H), 6.60 (d,  $J$  = 9.6 Hz, 3H), 6.13 (d,  $J$  = 15.6 Hz, 1H), 2.24 (s, 12H). MS:  $[\text{M}+\text{H}]^+ = 223.2$ .

$^1\text{H}$  NMR for **1c** (400 MHz,  $\text{D}_2\text{O}$ )  $\delta$  7.83 (d,  $J$  = 15.4 Hz, 3H), 7.30 (d,  $J$  = 9.8 Hz, 1H), 6.38 (d,  $J$  = 9.8 Hz, 1H), 6.11 (d,  $J$  = 15.4 Hz, 3H), 3.75 – 3.63 (m, 10H), 2.97 (td,  $J$  = 6.1, 1.6 Hz, 7H), 2.16 – 2.13 (s, 9H), 2.12 (s, 3H). MS:  $[\text{M}+\text{H}]^+ = 147.2$

---

(1) Ranu, B. C., Mandal, T. *Aust. J. Chem.*, **2007**, 60, 223.

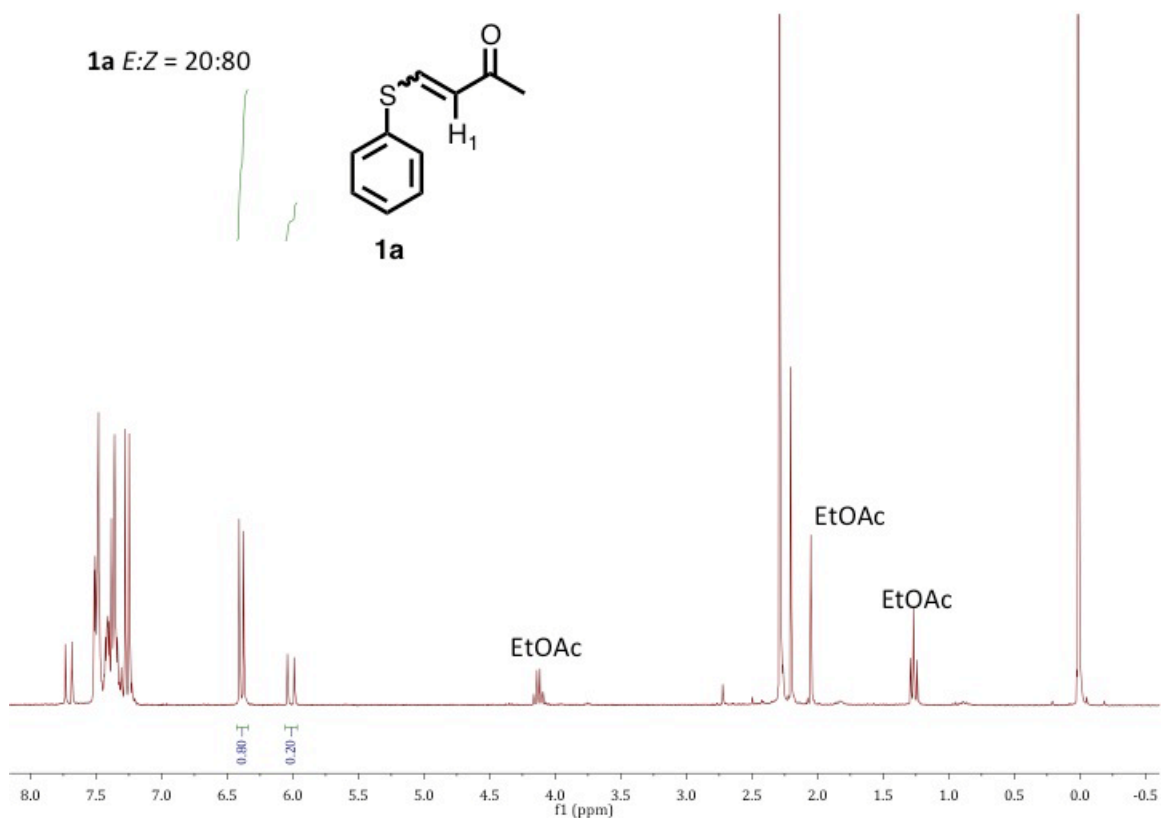

**Figure S1.**  $^1\text{H}$  NMR of **1a**.

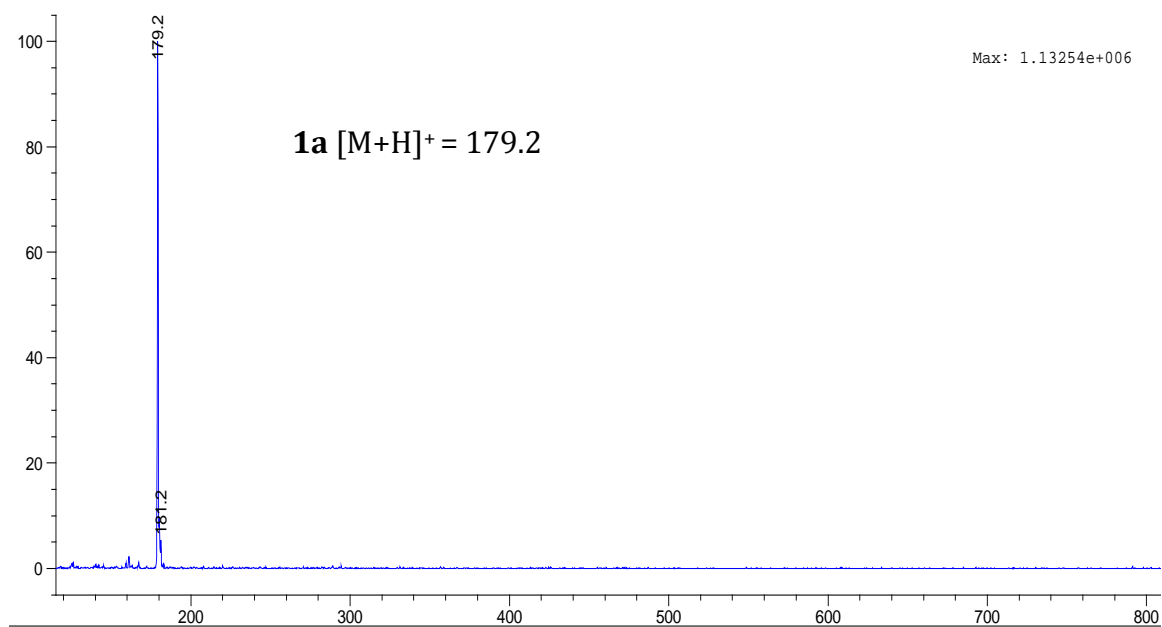

**Figure S2.** MS for **1a**.

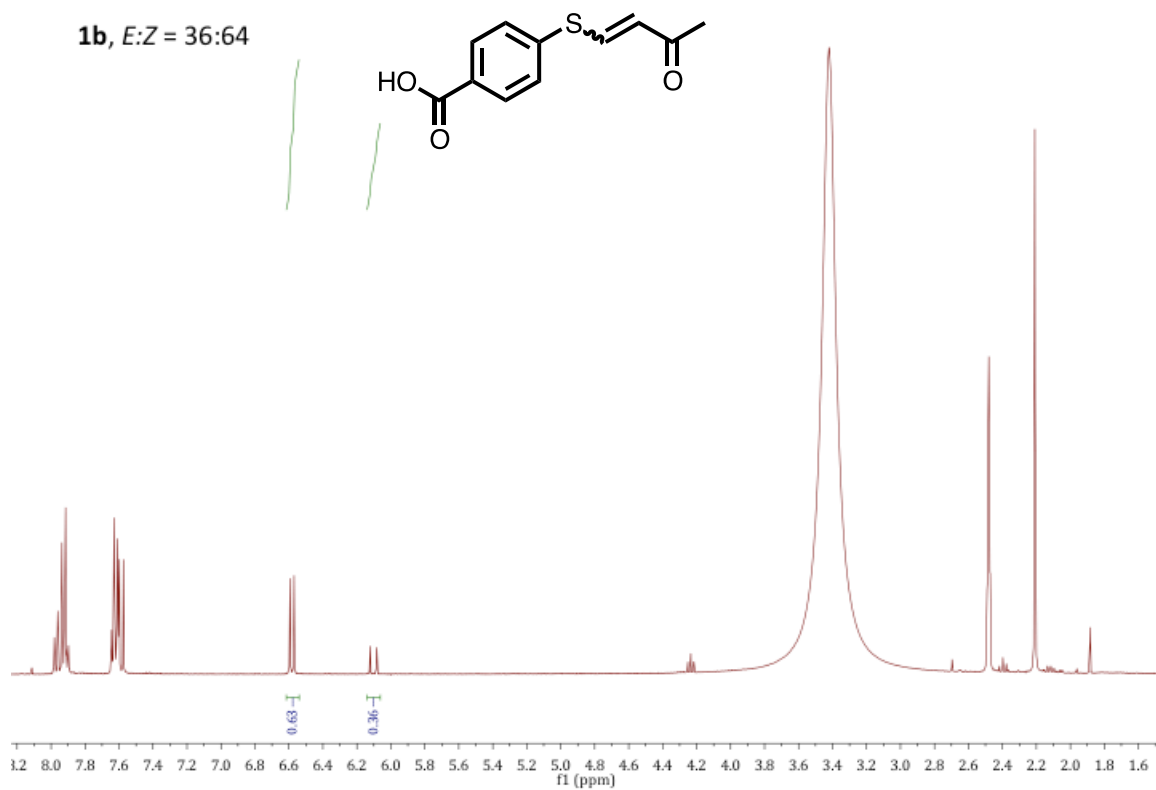

**Figure S3.**  $^1\text{H}$  NMR of **1b**.

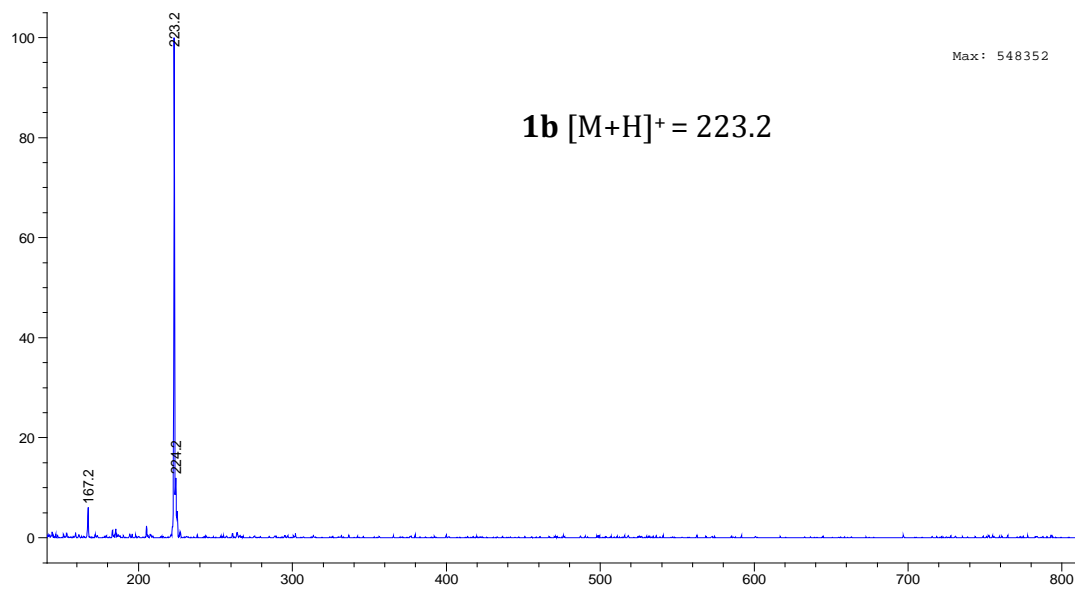

**Figure S4.** MS for **1b**.

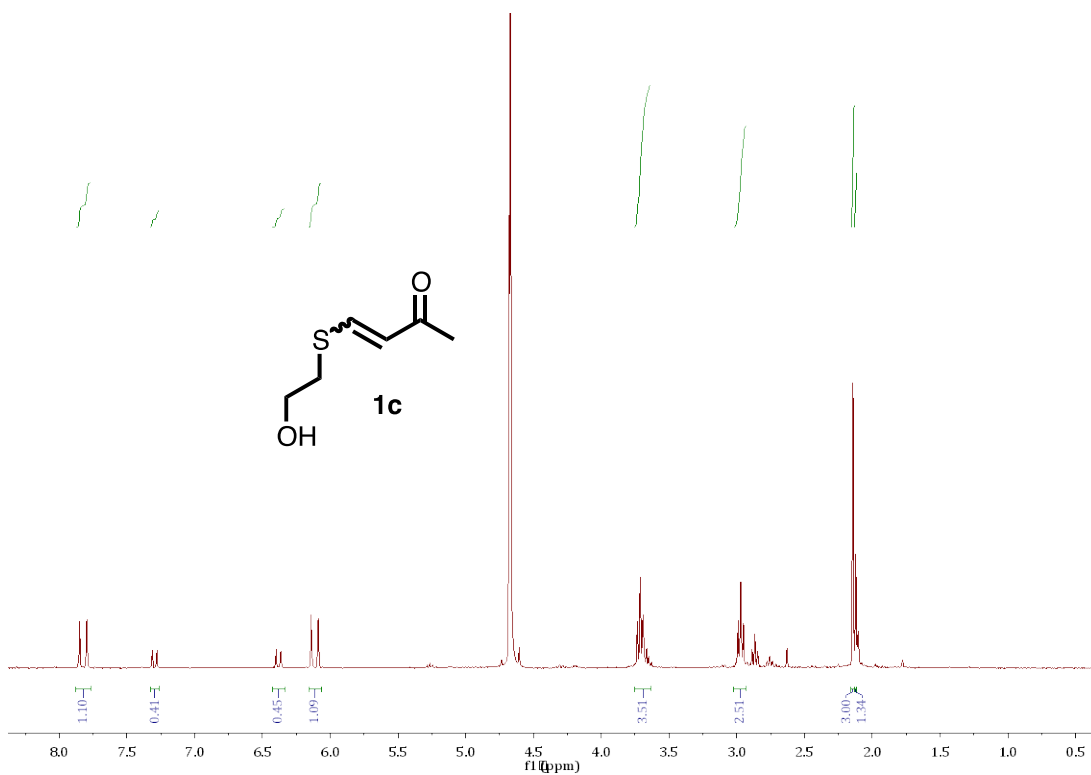

**Figure S5.**  $^1\text{H}$  NMR of **1c**.

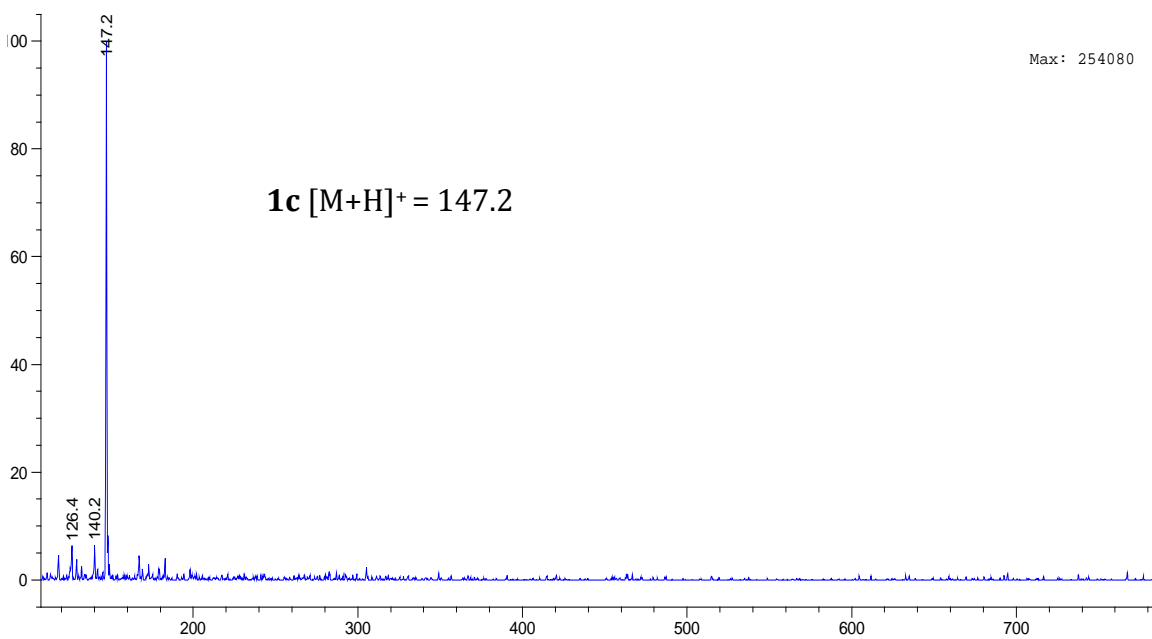

**Figure S6.** MS for **1c**.

### **Exchange Studies of VSC's and thiols in DMSO-*d*<sub>6</sub>**

The exchange studies with **1a** and thiols **2c** and **2b** were carried out in DMSO-*d*<sub>6</sub> and monitored by <sup>1</sup>H-NMR. 10 μMol solution of **1a** was prepared (1.8 mg/mL) and 1 equiv of Et<sub>3</sub>N was added. To this **2c** (1 mg, 1.2 equiv) was added and the <sup>1</sup>H-NMR was recorded every 5 min for 2 hours. The spectra did not change from 50 min to 2 hours. **2b** (1.7 mg, 1.2 equiv) was then added and <sup>1</sup>H-NMR was recorded 5 min, 1 hour, 2 hours, 14 hours and 24 hours. The spectra did not change from 14 hours to 24 hours (Figure 1).

### **Exchange Studies of VSC's and thiols in Phosphate Buffer in D<sub>2</sub>O/DMSO-*d*<sub>6</sub> (4:1)**

10 mL phosphate buffer solution (PBS, 10 mMol, pD = 7.7) was prepared using D<sub>2</sub>O/DMSO-*d*<sub>6</sub> (4:1).

10 μMol solution of **1c** (2.2 mg/mL) was prepared in PBS (pD = 7.7). To this **2c** (1 mg) was added and the <sup>1</sup>H NMR were recorded every 5 min for 2 hours (Figure 2).

### **Exchange studies of BDTC's and thiols in DMSO-*d*<sub>6</sub>**

Compound **6** was dissolved in DMSO-*d*<sub>6</sub> and 1 equiv of Et<sub>3</sub>N and excess thiophenol **2a** was added and the <sup>1</sup>H-NMR and LCMS were recorded for 30 days. The stack of <sup>1</sup>H NMR is shown in Figure S7.

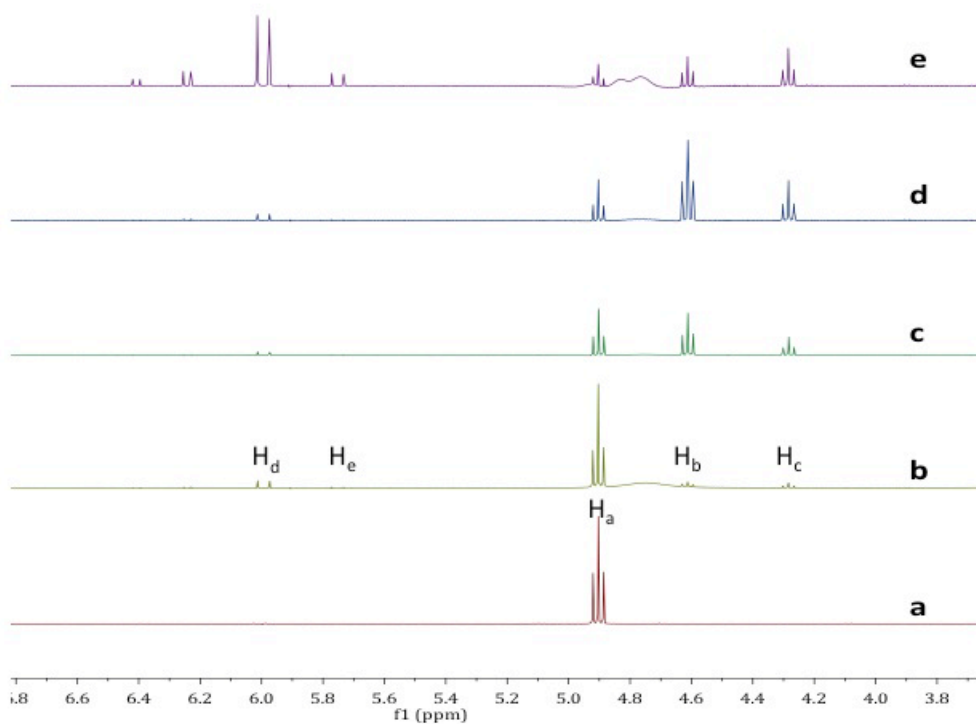

**Figure S7.** <sup>1</sup>H NMR monitoring of Et<sub>3</sub>N catalysed dithiane exchange in DMSO-*d*<sub>6</sub>. (a) Partial <sup>1</sup>H NMR of **6**. (b) 1 hour after the addition of **2c**. (c) 17 hours after the addition of **2c**. (d) 3 days after the addition of **2c**. (e) 30 days after the addition of **2c**.

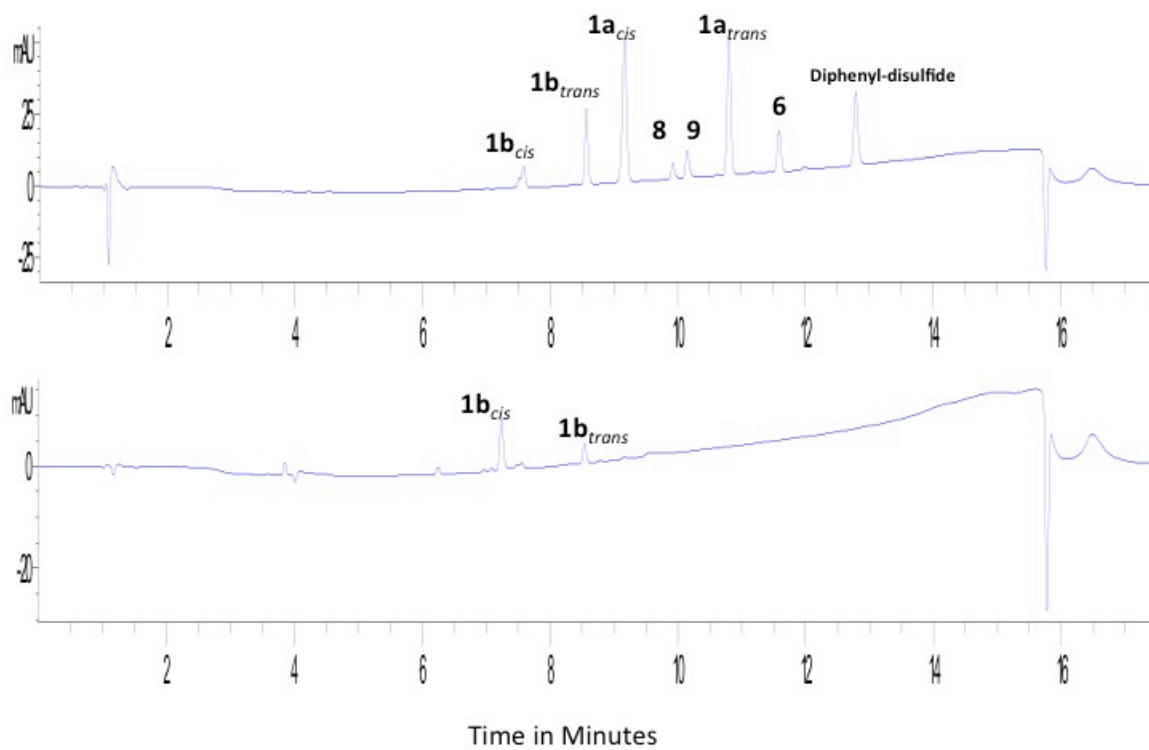

**Figure S8.** LCMS monitoring. (a) LCMS of **1b**. (b) LCMS after 2 hours of addition of **2a** to **1b**.



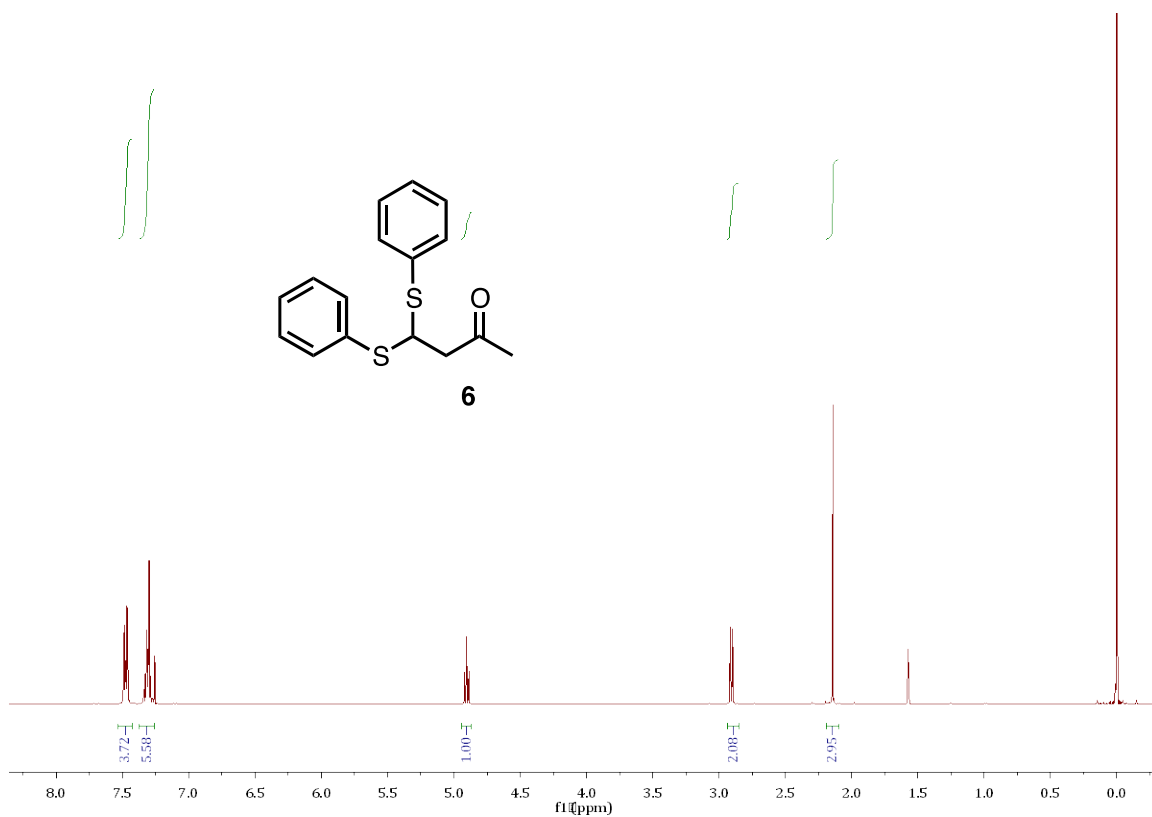

**Figure S9.** <sup>1</sup>H NMR of **6**.

Compound **6**: <sup>1</sup>H NMR (400 MHz, CDCl<sub>3</sub>)  $\delta$  = 7.53 – 7.43 (m, 4H), 7.37 – 7.26 (m, 6H), 4.90 (t,  $J$  = 6.9 Hz, 1H), 2.91 (d,  $J$  = 7.0 Hz, 2H), 2.14 (s, 3H).

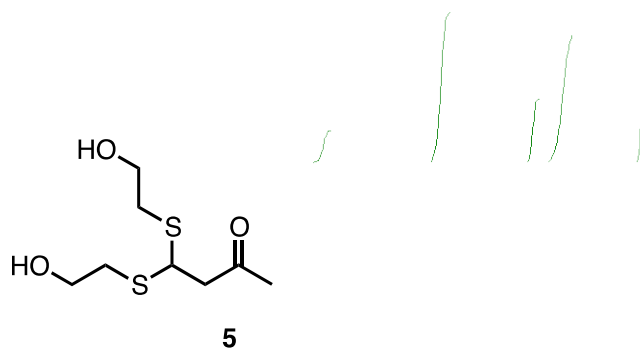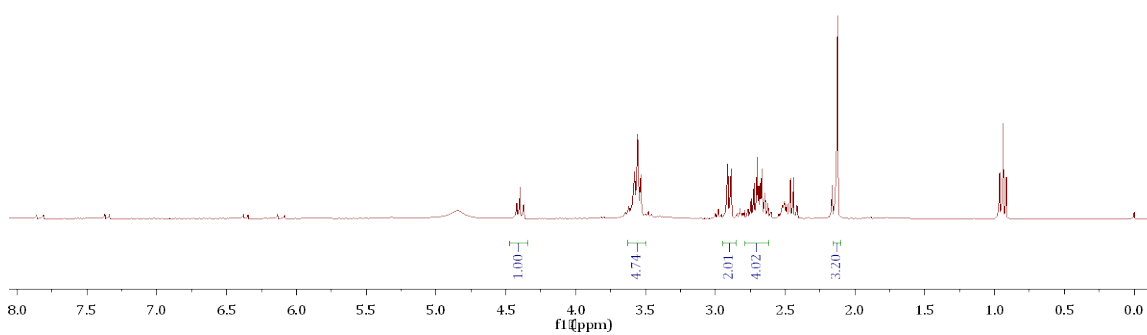

**Figure S10.**  $^1\text{H}$  NMR of compound **5**, synthesized in NMR tube by adding **2c** to **1c** in presence of  $\text{Et}_3\text{N}$ .

Compound **5**:  $^1\text{H}$  NMR (400 MHz,  $\text{DMSO-}d_6$ )  $\delta$  4.40 (t,  $J = 7.4$ , 1H), 3.63 – 3.49 (m, 4H), 2.90 (d,  $J = 7.4$  Hz, 2H), 2.79 – 2.62 (m, 4H), 2.13 (s, 3H).
